# Supplementary material for: Comprehensive QTL analyses of nitrogen use efficiency in indica rice
Source: Front Plant Sci. 2022 Sep 23;13:992225. doi: 10.3389/fpls.2022.992225 (PMC9539535; doi:10.3389/fpls.2022.992225)
Supplement: Supplementary file 14 [file Table_7.XLSX]

## Sheet: S7
Supplementary Table S7. The top 50 co-expressed genes of OsbZIP59 identified by co-expression network analysis.
RAP-DB ID	Description	Mutual rank	Weighted PCCa
Os01g0233400	Conserved hypothetical protein	3.464	0.635989
Os06g0677700	YT521-B-like protein family protein	18.166	0.62682
Os03g0174100	Similar to RNA Binding Protein 45	23.875	0.572235
Os06g0332900	Zinc finger, RanBP2-type domain containing protein	24.495	0.572982
Os02g0507600	Conserved hypothetical protein	26.077	0.558959
Os02g0712400	Similar to AP2 domain containing protein RAP2.9	30.984	0.512624
Os12g0527800	Zinc finger, PHD-type domain containing protein	32.373	0.577901
Os01g0753000	Colicin E3, catalytic domain containing protein	32.619	0.523312
Os08g0559300	Similar to Gibberellin action negative regulator SPY	36.538	0.533515
Os03g0130800	Bromodomain containing protein	38.781	0.563043
Os11g0162000	Similar to RNA-binding region RNP-1	40.804	0.560662
Os01g0111200	Conserved hypothetical protein	46.033	0.540729
Os03g0794900	Frigida-like family protein	51.73	0.542069
Os02g0612800	HMG-I and HMG-Y, DNA-binding domain containing protein	52.981	0.566847
Os01g0672800	Protein of unknown function DUF1421 family protein	54.544	0.437424
Os10g0396400	Leucine-rich repeat, cysteine-containing containing protein	55	0.547492
Os10g0151800	RNA-binding region RNP-1 domain containing protein	57.158	0.506235
Os05g0221200	Similar to 2o545-prov protein	57.324	0.490175
Os04g0539500	Zinc finger, GATA-type domain containing protein	57.602	0.540578
Os01g0558500	PWWP domain containing protein	63.718	0.50859
Os04g0665700	Zinc finger, CCCH-type domain containing protein	65.727	0.527512
Os11g0199600	Zinc finger, CCHC-type domain containing protein	67.194	0.494958
Os06g0495700	Conserved hypothetical protein	67.454	0.479592
Os02g0332800	Non-protein coding transcript, unclassifiable transcript	67.69	0.443311
Os05g0489700	Similar to BZIP protein BZO2H3 (Fragment)	67.823	0.521551
Os02g0194000	Myb, DNA-binding domain containing protein	70.824	0.51842
Os09g0551600	Similar to HMGd1 protein	71.19	0.508847
Os10g0460500	Conserved hypothetical protein	72.36	0.478381
Os12g0233800	Similar to DNA-binding factor of bZIP class	77.782	0.456027
Os03g0234600	Conserved hypothetical protein	80.006	0.503473
Os10g0564100	SOH1 family protein	83.666	0.49094
Os08g0326300	Plant MuDR transposase domain containing protein	83.714	0.507732
Os12g0638600	Conserved hypothetical protein	86.441	0.532645
Os06g0183800	Similar to Chromatin remodeling factor CHD3	91.071	0.511332
Os04g0672800	Conserved hypothetical protein	91.782	0.489652
Os03g0308600	Conserved hypothetical protein	93.766	0.486727
Os04g0306400	Ribose 5-phosphate isomerase family protein	94.074	0.444993
Os07g0580800	Conserved hypothetical protein	103.909	0.481132
Os05g0115700	Similar to UDP-galactose transporter related protein-like	104.441	0.504556
Os04g0667500	ubiquitin carboxyl-terminal hydrolase	105.83	0.480377
Os12g0141800	Conserved hypothetical protein	107.471	0.470488
Os08g0543600	Conserved hypothetical protein	110.743	0.520536
Os12g0574800	Bromodomain transcription factor containing protein	111.216	0.50792
Os08g0499900	Leucine-rich repeat, cysteine-containing containing protein	111.803	0.511378
Os05g0156200	Conserved hypothetical protein	112.161	0.468817
Os02g0656500	DnaJ-like protein	115.607	0.469844
Os02g0746000	Similar to Cullin-3 (CUL-3). Splice isoform 3	118.347	0.492465
Os04g0566500	Similar to Argonaute protein	118.355	0.531514
Os12g0485400	Similar to Cyclin T1 (Fragment)	126.704	0.513317
Os09g0249600	Conserved hypothetical protein	128.864	0.501476
aWeighted PCC, weighted Pearson’s correlation coefficient.
